# Supplementary material for: Rapid interactome profiling by massive sequencing
Source: PubMed Central journal article supplement — Nucleic Acids Res. 2010 Feb 9;38(9):e110. doi: 10.1093/nar/gkq052 (PMC2875021; doi:10.1093/nar/gkq052), 2010-02-09
Supplement: gkq052_1.pdf [file gkq052_1.pdf]

# SUPPLEMENTARY INFORMATION

Supplementary Figure 1. Characteristics of the novel pPAO10 vector.

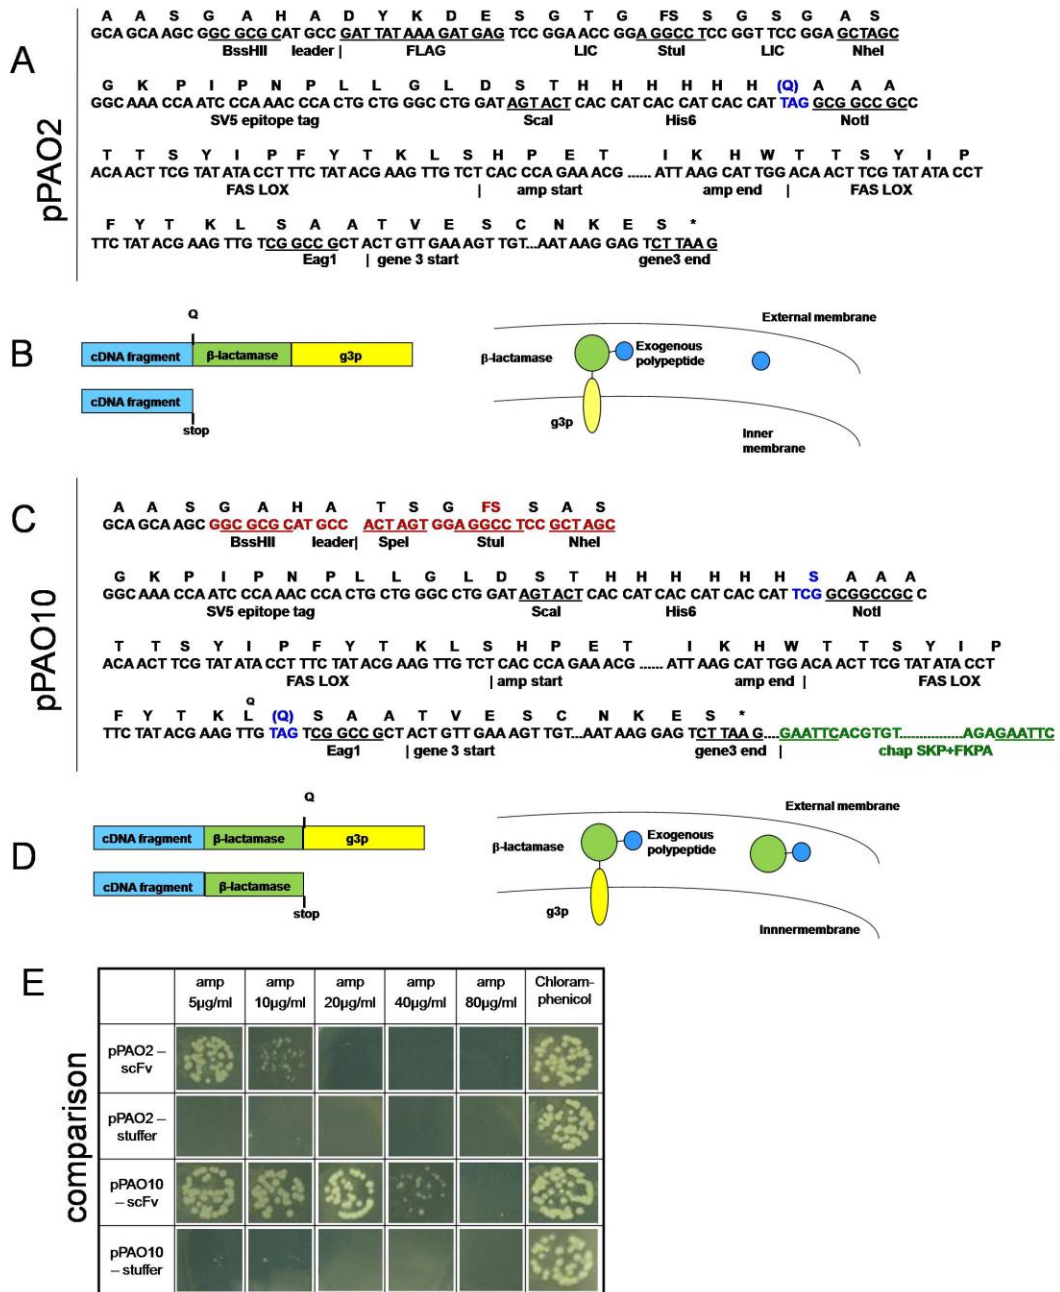

A) Scheme of the original phagemid vector pPAO2; B) the presence of the amber stop codon TAG results in the production of two polypeptides, only one of which in fusion with  $\beta$ -lactamase; C) scheme of the novel pPAO10 vector; significant differences from the original pPAO2 vector are marked with different colors; D) in the novel vector 100% of expressed polypeptides carries  $\beta$ -lactamase; E) Comparison of the growth of bacteria harboring either pPAO2 or pPAO10 on agar plates containing serial dilutions of ampicillin, when carrying an ORF (represented by a single chain antibody – scFv) or an out-of-frame sequence (stuffer). Bacteria plated on chloramphenicol only (constitutively resistance carried by all plasmids) represent 100% of growth.

## SUPPLEMENTARY METHODS

### Creation and validation of the pPAO10 vector

The pPAO2 phagemid vector<sup>3</sup> allows selection of ORFs, by expressing polypeptides in fusion with the enzyme  $\beta$ -lactamase (Supplementary Fig. 1A and 1B). In the DH5 $\alpha$  *E.coli* strain, when an exogenous DNA fragment is cloned in frame, the TAG *amber* stop codon (which can be translated as a glutamine or recognized as a stop codon) determines the expression of two polypeptides (Supplementary Fig. 1B), one of them in fusion with  $\beta$ -lactamase, resulting in the positive selection of the clone on ampicillin-containing agar plates. The original pPAO2 vector was improved by creating a new version, named pPAO10 (Supplementary Fig 1C and 1D), with three main new features:

*i) repositioning of the amber stop codon.* The original *amber* stop codon was substituted by a codon encoding for a serine, and re-introduced after the second *lox* site. As a result polypeptides are always expressed in fusion with  $\beta$ -lactamase (Supplementary Fig. 1D) both in the soluble or G3P fused form. The replacement of the stop codon was done by PCR mutagenesis, by amplifying the original pPAO2 polylinker with the primer sense VLPT2 5'-tac cta ttg cct acg gca gcc gct gga ttg tta tta ctc-3', annealing in correspondence of the BssHII site, and the antisense primer G3P-stop 5'-agt tgt ggc ggc cgc cga atg gtg atg gtg agg tg-3', introducing the new stop codon at the 5' of the EagI restriction site. The resulting PCR product was cloned as BssHII-EagI fragment in the backbone of the original pPAO2 vector. The polylinker of this intermediate vector was PCR amplified again with the primer sense VLPT2 and the antisense His-nostop-NotI 5'-agt tgt ggc ggc cgc cga atg gtg atg gtg atg gtg ag-3', with a single A $\rightarrow$ C mutation in the original stop codon, resulting in a serine codon. This was cloned as BssHII-NotI fragment into the vector carrying the new stop codon at the 3' end of the beta-lactamase gene.

*ii) Modification of the polylinker.* The FLAG tag at the N-terminus was removed and the polylinker was streamlined; the new polylinker reported in Supplementary Figure 1C carries BssHII and NheI restriction sites for directional cloning, SpeI site for random cloning with SpeI adapters, and StuI site for blunt-ended fragment cloning.

*iii) Over-expression of chaperon proteins.* Skp/ompH and FkpA have been described as important elements to improve the folding of proteins in the periplasmic space<sup>13, 14</sup>. These genes were cloned downstream of geneIII, reported in green in the scheme. The Skp/OmpH chaperon gene was PCR amplified from *E.coli* genomic DNA, with its own promoter, by using the primer Skp-sense 5'-acg tga att cac gtg tgt tct cca caa agg aat-3', introducing the EcoRI site, and Skp-antisense 5'-agc tga att ctc tag atc ttt att taa cct gtt tca-3', introducing BglII and EcoRI sites, and cloned in the EcoRI site of the vector at the 3' end of the geneIII. The BglII site introduced by the Skp-antisense primer was used for the cloning of the FkpA chaperon

gene, amplified from *E.coli* genomic DNA with primers FkpA-sense 5'-agc tag atc tct gcc cgc act cat ttc gcg gtc atc-3' and Fkp-antisense 5'-ggg cag atc ttg att ttg tag cag aat ctg cg-3', introducing the BglII site. The correct orientation of both Skp and FkpA genes, as well as the confirmation that all the introduced mutations were correct, were assessed by DNA sequencing. The resulting vector is called pPAO10.

The novel pPAO10 and the original pPAO2 vectors were compared in their ability to grow with increasing concentrations of ampicillin, with either an ORF (represented in the example reported here by a single chain antibody fragment – scFv –, a relatively large structure of approximately 300 aminoacids) or a not-ORF (reported here as “stuffer”) cloned into the vectors (Supplementary Fig. 1E). The four resulting constructs were transformed into *E.coli* DH5 $\alpha$  strain and the bacteria assayed for growth on increasing concentrations of ampicillin (0 to 80  $\mu$ g/ml). The pPAO10 vector showed a 4-fold increased resistance to ampicillin compared to the pPAO2 vector when carrying an ORF; neither vector conferred resistance to ampicillin with a not-ORF sequence.

## Supplementary Figure 2. Focussing of selected clones

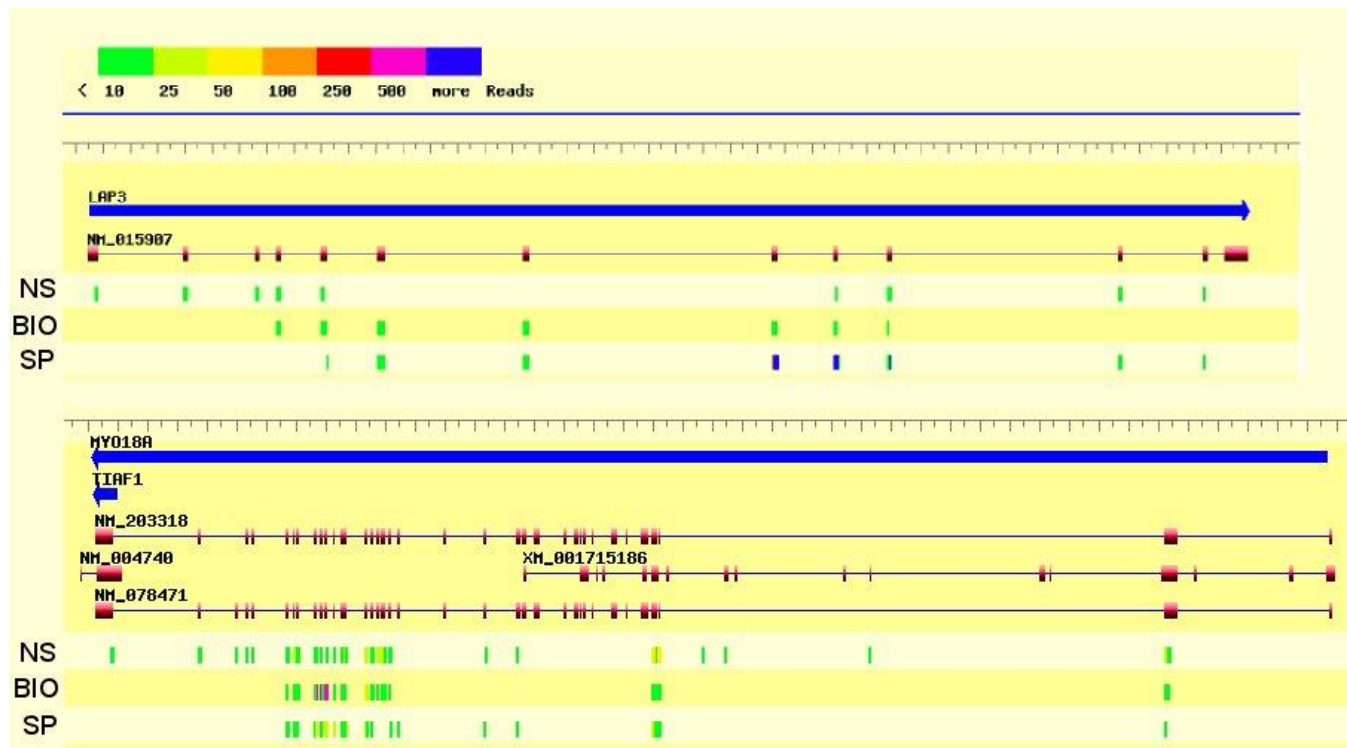

Genomic context of LAP3 (upper panel) and MYO18A (lower panel) genes, two of the top ranked ones, showing the gene aligned to the supporting sequences obtained before (NS) and after selection (BIO, SP). Blue bars on top of each panel represent genes, red boxes correspond to exons (RefSeq mRNAs) of the gene, blue lines depict introns. Rectangles in the lanes labeled NS, BIO and SP are colored according to the color code in the legend and show sequencing depth obtained from the three libraries. Regions with high sequencing depth represent enriched fragments, are only observed in the selected libraries (i.e. blue region in the SP selection in the LAP3 panel, and purple region in the BIO selection in the MYO18A panel) and correspond to specific interacting domains. A similar panel can be obtained from [www.interactomeataglance.org](http://www.interactomeataglance.org) for all the genes represented in the libraries.

**Supplementary Table 1. Identity of the first 50 ranked genes in the NS, BIO and SP libraries.**

**A) Non selected library, first 50 ranked genes**

| NS       |       |       |             |
|----------|-------|-------|-------------|
| hugo     | Reads | Depth | Focus_index |
| MYH9     | 680   | 130   | 0,19        |
| PLEC1    | 430   | 52    | 0,119       |
| TNKS1BP1 | 316   | 183   | 0,576       |
| HSPA1A   | 232   | 59    | 0,25        |
| NUMA1    | 187   | 33    | 0,171       |
| RPL4     | 175   | 157   | 0,891       |
| MYH14    | 172   | 55    | 0,314       |
| EIF4G1   | 170   | 122   | 0,712       |
| FLNA     | 167   | 20    | 0,114       |
| SLC38A10 | 162   | 68    | 0,414       |
| MAP3K13  | 158   | 144   | 0,905       |
| RRBP1    | 148   | 34    | 0,223       |
| H19      | 145   | 55    | 0,372       |
| ACTN4    | 144   | 43    | 0,292       |
| HSD17B10 | 140   | 119   | 0,843       |
| NUCB1    | 138   | 51    | 0,362       |
| COL6A2   | 135   | 43    | 0,311       |
| LAMB2    | 131   | 34    | 0,252       |
| SPTBN1   | 130   | 25    | 0,185       |
| PRDX5    | 130   | 101   | 0,769       |
| LRP1     | 128   | 17    | 0,125       |
| SPTAN1   | 119   | 26    | 0,21        |
| FLOT1    | 119   | 66    | 0,546       |
| DCTN1    | 112   | 58    | 0,509       |
| PPL      | 110   | 23    | 0,2         |
| CHGA     | 110   | 48    | 0,427       |
| TLN1     | 107   | 18    | 0,159       |
| LRPAP1   | 107   | 41    | 0,374       |
| FLNB     | 102   | 16    | 0,147       |
| KRT8     | 101   | 32    | 0,307       |
| RNF40    | 101   | 34    | 0,327       |
| MYO18A   | 101   | 36    | 0,347       |
| MVP      | 101   | 43    | 0,416       |
| LTBP2    | 99    | 64    | 0,636       |
| CLIP2    | 95    | 26    | 0,263       |
| TNIP1    | 94    | 43    | 0,447       |
| PLXNB2   | 91    | 25    | 0,264       |
| ASPH     | 90    | 27    | 0,289       |
| FLNC     | 87    | 18    | 0,195       |
| COL4A2   | 85    | 12    | 0,129       |
| KIF1C    | 82    | 35    | 0,415       |
| ST14     | 82    | 62    | 0,744       |
| SART1    | 81    | 27    | 0,321       |
| LMNA     | 81    | 28    | 0,333       |
| EEF1D    | 81    | 33    | 0,395       |

|         |    |    |       |
|---------|----|----|-------|
| HDLBP   | 80 | 30 | 0,363 |
| GSN     | 79 | 25 | 0,304 |
| TPM3    | 79 | 71 | 0,886 |
| EMILIN1 | 78 | 20 | 0,244 |
| ROBLD3  | 78 | 71 | 0,897 |

## B) BIO selected library, first 50 ranked genes

| BIO      | Reads | Depth | Focus_index |
|----------|-------|-------|-------------|
| ALDOB    | 4975  | 4935  | 0,992       |
| TTC31    | 1974  | 1898  | 0,961       |
| SMOC1    | 1286  | 1210  | 0,94        |
| ZNF23    | 536   | 318   | 0,591       |
| MYO18A   | 526   | 463   | 0,878       |
| MYH9     | 522   | 381   | 0,728       |
| TOP1     | 511   | 499   | 0,975       |
| TAF3     | 488   | 460   | 0,941       |
| EIF2B4   | 466   | 420   | 0,899       |
| RBMX2    | 440   | 431   | 0,977       |
| CARS     | 386   | 361   | 0,933       |
| MAP1A    | 370   | 311   | 0,838       |
| NOP56    | 364   | 319   | 0,874       |
| ANKRD11  | 354   | 276   | 0,777       |
| TCEB3    | 321   | 290   | 0,9         |
| COL12A1  | 272   | 254   | 0,93        |
| TBC1D10B | 262   | 239   | 0,908       |
| CCDC124  | 239   | 222   | 0,925       |
| PDIA4    | 230   | 212   | 0,917       |
| DNAJC17  | 228   | 203   | 0,886       |
| LRRC59   | 191   | 163   | 0,848       |
| CLU      | 186   | 174   | 0,93        |
| FN1      | 181   | 149   | 0,818       |
| ZNF407   | 175   | 164   | 0,931       |
| H19      | 164   | 124   | 0,75        |
| GIGYF2   | 157   | 155   | 0,981       |
| TRAF3IP1 | 134   | 112   | 0,828       |
| CREB3L1  | 132   | 125   | 0,939       |
| CCDC80   | 130   | 116   | 0,885       |
| ZNF320   | 127   | 123   | 0,961       |
| ABCF1    | 125   | 96    | 0,76        |
| NIPBL    | 103   | 87    | 0,835       |
| UBAP2L   | 103   | 93    | 0,893       |
| PLEC1    | 100   | 12    | 0,11        |
| PPP1R9B  | 100   | 89    | 0,88        |
| PCBD2    | 99    | 56    | 0,556       |
| AP3D1    | 99    | 88    | 0,879       |
| SERTAD2  | 97    | 94    | 0,959       |
| STAU1    | 95    | 62    | 0,642       |
| MLF2     | 90    | 84    | 0,922       |
| EIF5B    | 85    | 69    | 0,8         |

|         |    |    |       |
|---------|----|----|-------|
| PITX1   | 85 | 70 | 0,812 |
| RRBP1   | 83 | 27 | 0,313 |
| PBXIP1  | 82 | 52 | 0,622 |
| CCDC55  | 81 | 77 | 0,938 |
| SND1    | 76 | 47 | 0,605 |
| CIZ1    | 75 | 60 | 0,787 |
| GHITM   | 73 | 56 | 0,753 |
| MAP1B   | 72 | 31 | 0,417 |
| PCDHGA1 | 72 | 50 | 0,681 |

### C) SP selected library, first 50 ranked genes

| SP           |       |       |             |
|--------------|-------|-------|-------------|
| hugo         | Reads | Depth | Focus_index |
| LAP3         | 918   | 826   | 0,899       |
| GSTO2        | 850   | 815   | 0,958       |
| FN1          | 685   | 599   | 0,873       |
| H19          | 372   | 269   | 0,72        |
| HSPA1A       | 223   | 164   | 0,731       |
| HOXB6        | 215   | 197   | 0,912       |
| SRRT         | 204   | 172   | 0,838       |
| HNRNPUL2     | 154   | 107   | 0,688       |
| MYH9         | 150   | 24    | 0,153       |
| CSRP1        | 141   | 113   | 0,794       |
| PLEC1        | 137   | 26    | 0,182       |
| CDKN1A       | 129   | 119   | 0,915       |
| CDC37        | 126   | 102   | 0,802       |
| DDX21        | 125   | 119   | 0,944       |
| ALDOB        | 125   | 122   | 0,968       |
| CLU          | 124   | 110   | 0,879       |
| TNKS1BP1     | 122   | 75    | 0,607       |
| RAB6B        | 121   | 104   | 0,851       |
| SAFB         | 120   | 95    | 0,783       |
| PRDX4        | 114   | 109   | 0,947       |
| LOC100131484 | 108   | 107   | 0,981       |
| G6PC3        | 104   | 101   | 0,962       |
| UBAP2L       | 101   | 90    | 0,881       |
| GHITM        | 97    | 80    | 0,814       |
| SERTAD2      | 97    | 93    | 0,948       |
| FLNB         | 96    | 82    | 0,844       |
| ZNF23        | 95    | 53    | 0,547       |
| PRDX5        | 90    | 80    | 0,878       |
| COL6A2       | 89    | 21    | 0,225       |
| TAF15        | 89    | 42    | 0,461       |
| TBC1D9B      | 88    | 54    | 0,602       |
| SPTBN1       | 87    | 44    | 0,494       |
| ISYNA1       | 87    | 68    | 0,77        |
| CHGB         | 86    | 49    | 0,558       |
| ACACA        | 85    | 84    | 0,976       |
| EIF4G1       | 84    | 69    | 0,81        |
| STOML2       | 83    | 76    | 0,904       |

|         |    |    |       |
|---------|----|----|-------|
| FLNA    | 82 | 29 | 0,341 |
| POLR2L  | 82 | 71 | 0,854 |
| LNX1    | 74 | 27 | 0,351 |
| COL4A2  | 73 | 29 | 0,384 |
| FBRSL1  | 73 | 55 | 0,74  |
| MMP14   | 71 | 34 | 0,465 |
| EEF2    | 70 | 34 | 0,471 |
| CCDC124 | 70 | 45 | 0,629 |
| UBXN1   | 69 | 59 | 0,841 |
| ATAD3B  | 67 | 32 | 0,463 |
| AZI1    | 67 | 65 | 0,955 |
| PCDHGA1 | 65 | 31 | 0,462 |
| ABCA2   | 65 | 47 | 0,708 |

Top 50 genes for each library. A) NS; B) BIO; C) SP. Genes are ranked according the number of supporting reads. Depth and focus indexes are also shown.
